# Supplementary material for: Western-style diet impedes colonization and clearance of Citrobacter rodentium
Source: PubMed Central journal article supplement (PMC8049485; doi:10.1371/journal.ppat.1009497), 2021-04-05
Supplement: ppat.1009497.s009.pdf [file ppat.1009497.s009.pdf]

**Supplemental table 1.** The composition of the purified diets used in this study.

| Product #                | D12492     |       | D13081106        |       | D12450J    |       |
|--------------------------|------------|-------|------------------|-------|------------|-------|
|                          | <i>WSD</i> |       | <i>WSD: Inul</i> |       | <i>CDD</i> |       |
|                          | gm%        | kcal% | gm%              | kcal% | gm%        | kcal% |
| Protein                  | 26         | 20    | 23               | 20    | 19         | 20    |
| Carbohydrate             | 26         | 20    | 40               | 20    | 67         | 70    |
| Fat                      | 35         | 60    | 31               | 60    | 4          | 10    |
| Total                    |            | 100   |                  | 100   |            | 100   |
| kcal/gm                  | 5.2        |       | 4.6              |       | 3.8        |       |
|                          |            |       |                  |       |            |       |
| Ingredient               | gm         | kcal  | gm               | kcal  | gm         | kcal  |
| Casein                   | 200        | 800   | 200              | 800   | 200        | 800   |
| L-Cystine                | 3          | 12    | 3                | 12    | 3          | 12    |
|                          |            |       |                  |       |            |       |
| Corn Starch              | 0          | 0     | 0                | 0     | 506.2      | 2025  |
| Maltodextrin 10          | 125        | 500   | 75               | 300   | 125        | 500   |
| Sucrose                  | 68.8       | 275   | 68.8             | 275   | 68.8       | 275   |
|                          |            |       |                  |       |            |       |
| Cellulose, BW200         | 50         | 0     | 0                | 0     | 50         | 0     |
| Inulin, Orafti HP        | 0          | 0     | 200              | 200   | 0          | 0     |
|                          |            |       |                  |       |            |       |
| Soybean Oil              | 25         | 225   | 25               | 225   | 25         | 225   |
| Lard                     | 245        | 2205  | 245              | 2205  | 20         | 180   |
|                          |            |       |                  |       |            |       |
| Mineral Mix, S10026      | 10         | 0     | 10               | 0     | 10         | 0     |
| DiCalcium Phosphate      | 13         | 0     | 13               | 0     | 13         | 0     |
| Calcium Carbonate        | 5.5        | 0     | 5.5              | 0     | 5.5        | 0     |
| Potassium Citrate, 1 H2O | 16.5       | 0     | 16.5             | 0     | 16.5       | 0     |
|                          |            |       |                  |       |            |       |
| Vitamin Mix, V10001      | 10         | 40    | 10               | 40    | 10         | 40    |
| Choline Bitartrate       | 2          | 0     | 2                | 0     | 2          | 0     |
|                          |            |       |                  |       |            |       |
| FD&C Yellow Dye #5       | 0          | 0     | 0                | 0     | 0.04       | 0     |
| FD&C Red Dye #40         | 0          | 0     | 0.05             | 0     | 0          | 0     |
| FD&C Blue Dye #1         | 0.05       | 0     | 0                | 0     | 0.01       | 0     |
| Total                    | 773.85     | 4057  | 873.85           | 4057  | 1055.1     | 4057  |
